# Supplementary material
Source: PubMed Central journal article supplement (PMC3138523)
Supplement: NIHMS295845-supplement-Supplementary_Information.pdf [file NIHMS295845-supplement-Supplementary_Information.pdf]

## List of Supplementary Material:

Fig. S1. Suppression of HIV-1 by A-1 aptamer and Ch A-1 chimera.

Fig. S2. Stability of 2'-fluoro modified Ch A-1 in mouse serum.

Fig. S3. Aptamer A-1 and Ch A-1 chimera, but not a mutant chimeric, suppress viral loads in HIV-1 infected RAG-hu mice.

Fig. S4. Protection of RAG-hu mice from CD4 T-cell loss by the Ch A-1 chimera.

Fig. S5. Sequence analysis of mutant virus from animals treated with Ch A-1.

Table S1. HIV-1 viral loads in individual RAG-hu mice.

Table S2. CD4:CD3 T-cell ratios in treated and control individual RAG-hu mice.

Table S3. *P*-values for effects on HIV-1 viral loads in individual RAG-hu mice.

Table S4. *P*-values for CD4:CD3 T-cell ratios in treated and control individual RAG-hu mice.

Figure S1

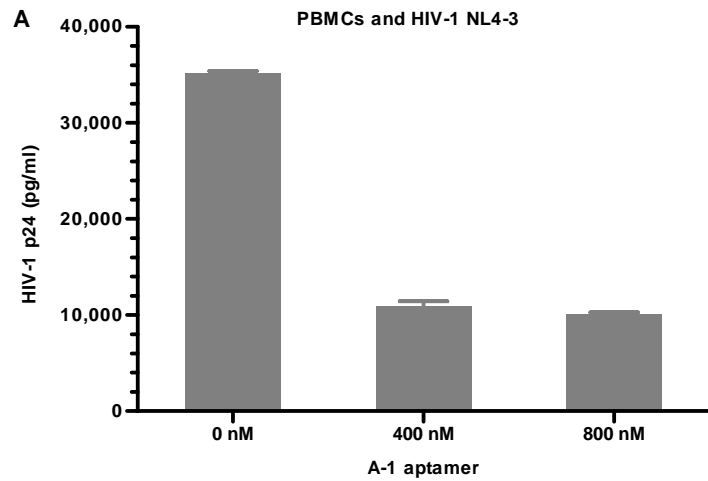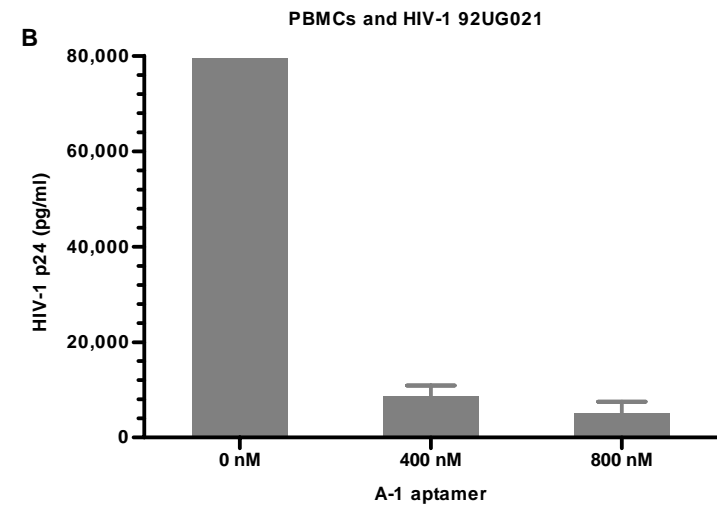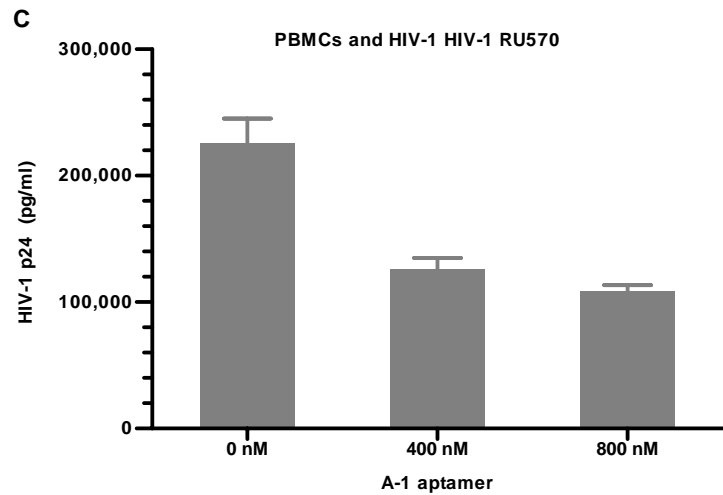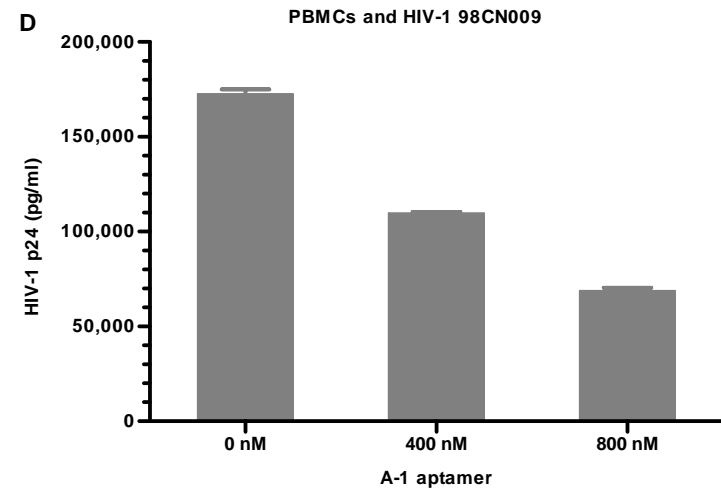

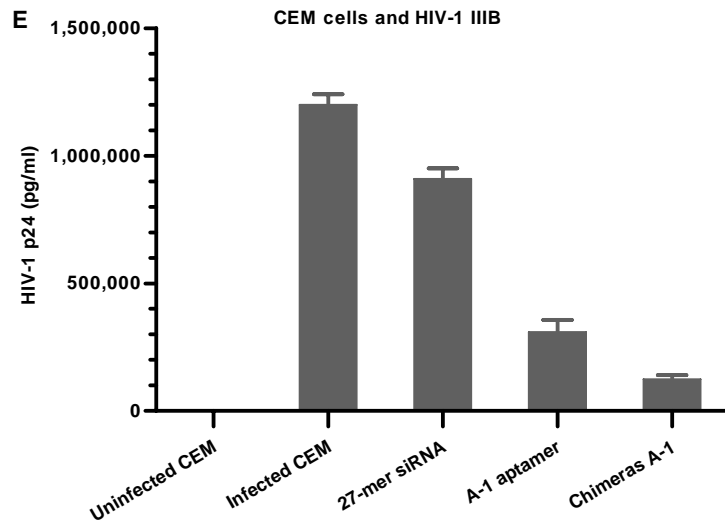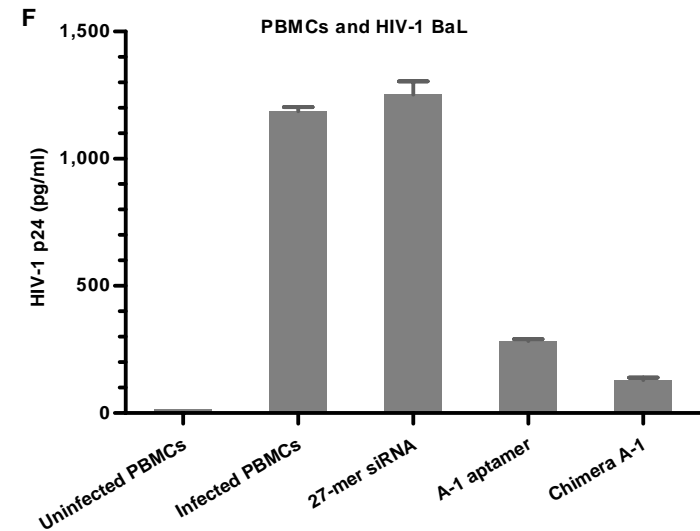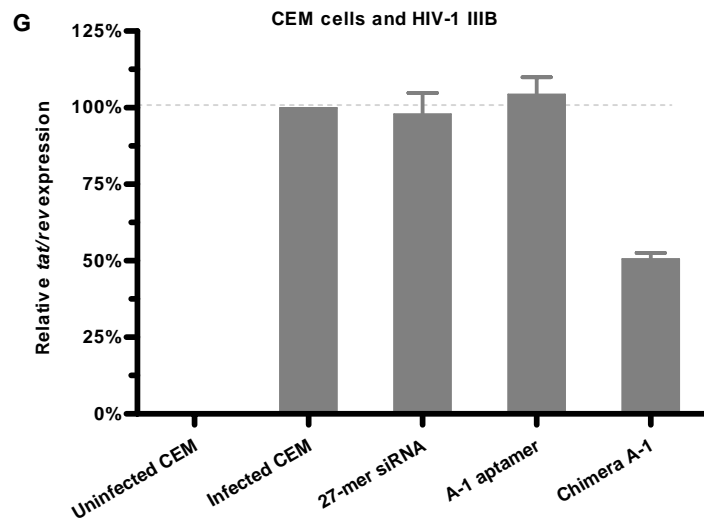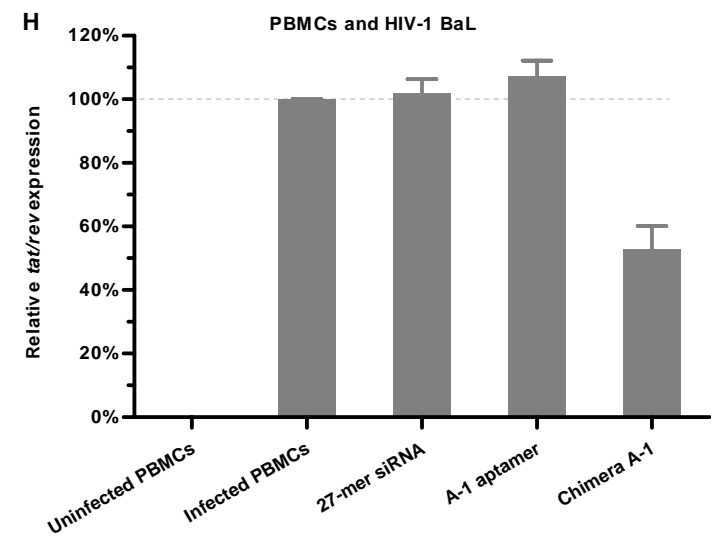

**Fig. S1. Suppression of HIV-1 by A-1 aptamer and Ch A-1 chimera.** (A-D) A-1 aptamer inhibition of HIV levels in PBMCs infected with various strains of HIV-1. Data are shown as concentration of HIV p24 core protein, measured 7 days after infection. (A) HIV-1 NL4.3, (B) HIV-1 92UG021, (C) HIV-1 RU570 and (D) HIV-1 98CN009. (E and F) A-1, Ch A-1, and siRNA inhibition of HIV-1 replication in (E) CEM cells infected with HIV-1 IIIB and in (F) PBMCs infected with HIV-1 BaL. Data are shown as concentration of HIV p24 core protein, measured 7 days after infection for (E) and 8 days after infection for (F). (G and H) Down regulation of *tat/rev* mRNA by A-1, Ch A-1, and siRNA in (G) HIV-1 IIIB-infected CEM cells and in (H) PBMCs cells infected with HIV-1 BaL. Data for *tat/rev* are shown relative to untreated, infected cells, measured 7 days after infection for (G) and 8 days after infection for (H). Error bars indicate SD ( $N = 3$ ).

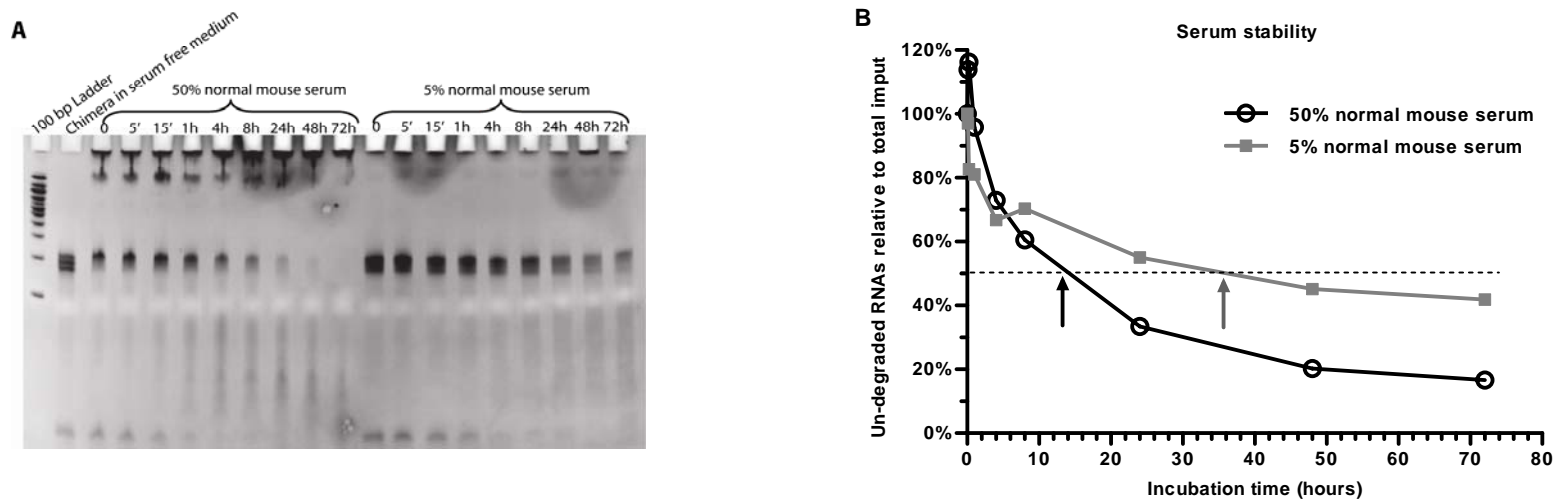

**Fig. S2. Stability of 2'-fluoro modified Ch A-1 in mouse serum.** (A) The Ch A-1 construct was incubated in 50% or 5% mouse serum (normal mouse serum, jackson immunoresearch laboratories) at 37°C for the lengths of time indicated and were resolved by 8% polyacrylamide electrophoresis. (B) The band intensities were quantitatively analyzed by Alphamager 3400 and percentage of un-degraded RNAs was calculated. As indicated by arrows, at 50% serum, 50% free RNA was retained at 16 h; at 5% serum, 50% free RNA was retained at 30 h.

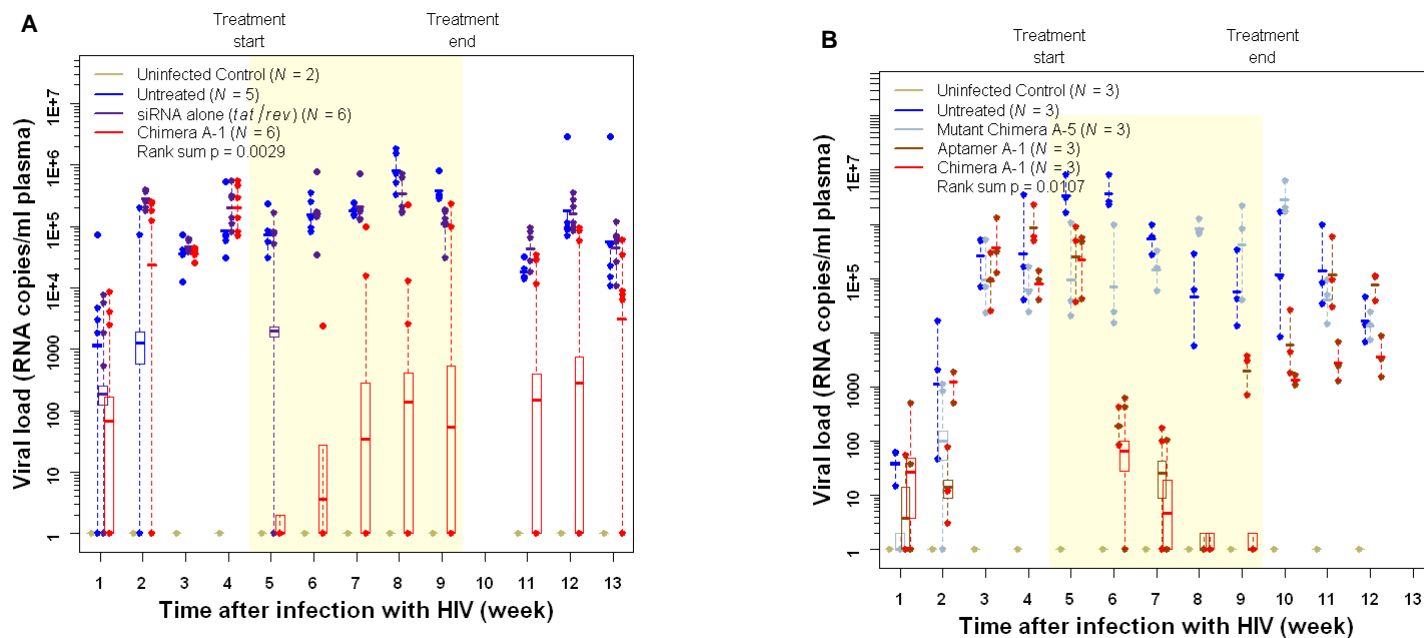

**Fig. S3. Aptamer A-1 and Ch A-1 chimera, but not a mutant chimeric, suppress viral loads in HIV-1 infected RAG-hu mice. Mice were infected with HIV-1 at week 0, and 5 weeks later, weekly treatments were started. The treatment period is indicated by the yellow region. (A) Viral loads in uninfected mice ( $N = 2$ ), untreated mice ( $N = 5$ ), *tat/rev* siRNA only treated mice ( $N = 6$ ) and Ch A-1--treated mice ( $N = 6$ ). (B) In a separate experiment, viral loads in uninfected mice, ( $N=3$ ), non-treated mice ( $N=3$ ), A-1 aptamer--treated mice ( $N=3$ ), Ch A1 chimera--treated mice ( $N=3$ ), and mutant A-5 chimera--treated mice ( $N=3$ ). The viral RNA was detected through qRT-PCR as described in Methods. Thus, if there was no detectable viral RNA we established this as a value of 1 (100) to allow for the use of logarithmic values on the Y-axis.  $P$  values for the effects of A-1 and Ch A-1 are indicated and were calculated as described in Materials and Methods. Box plot boundaries are  $\pm 1$  SD around the mean (horizontal line). Points have been jittered for easier interpretation.**

Figure S4

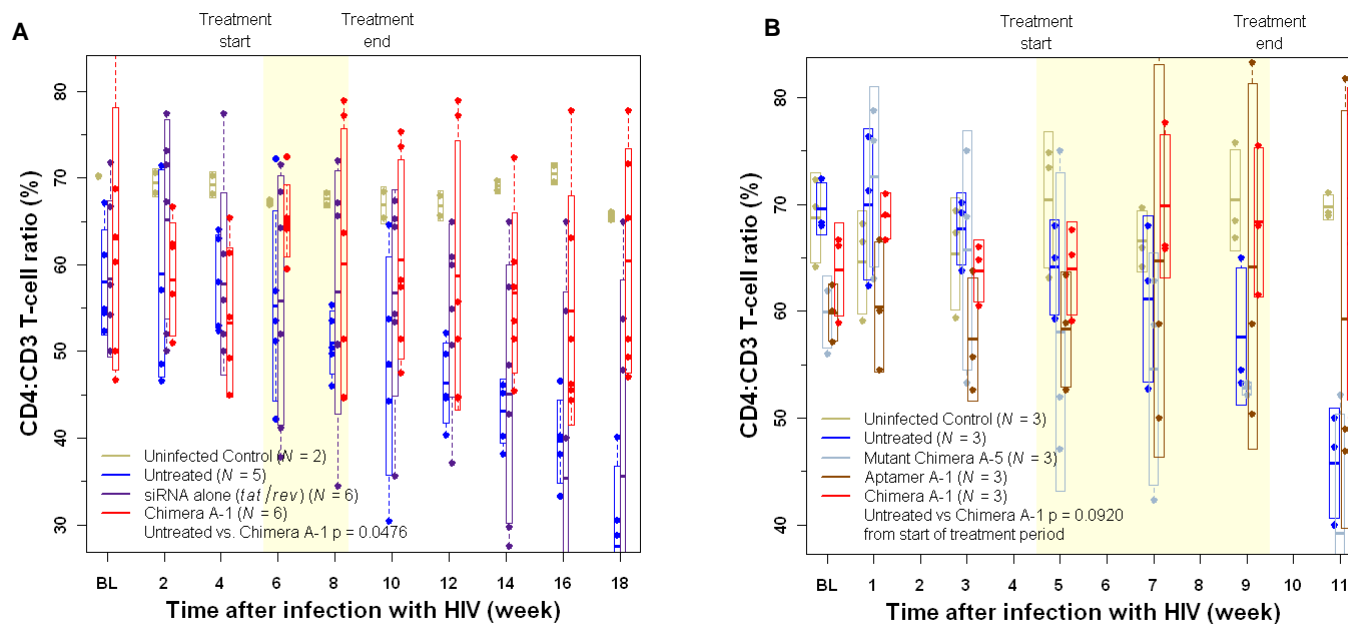

**Fig. S4. Protection of RAG-hu mice from CD4 T-cell loss by the Ch A-1 chimera. CD4 T-cell levels were assessed by FACS at each indicated week before and after siRNA treatment.** “BL” refers to the baseline measurement. Treatment duration is indicated by the yellow region. (A) Mice from the first experiment (shown in Fig. 2A) group. Uninfected mice ( $N = 2$ ), untreated mice ( $N = 5$ ), *tat/rev* siRNA treated mice ( $N = 6$ ), chimera Ch A-1 treated mice ( $N = 6$ ). (B) Mice from second experiment (shown in Figure 2B). CD4:CD3 T-cell ratios were assessed by FACS at each indicated week before and after treatment. Treatment duration and experimental animals are as in (A). Box plot boundaries are  $\pm 1$  SD around the mean (horizontal line). Points have been jittered for easier interpretation.  $P$  values for both experiments were determined as described in Materials and Methods. BL (base line): each individual mouse was bled two times prior to HIV-1 infection and averaged within treatment groups to establish a baseline CD4:CD3 level.

# Figure S5

Tat/rev site I domain: 5982-6008

HIV-1 gp120 domain: 6320...7747 nt

HIV-1 gp41 domain: 7796...8782 nt

| Index of nucleotides | Reference | Allele | SNP %  | Coverage | Overlapping annotations            | Amino_Acid_Change      |
|----------------------|-----------|--------|--------|----------|------------------------------------|------------------------|
| 5990                 | A         | A/G    | 0.186  | 71,352   | CDS: tat protein, CDS: rev protein | Gln -> Arg; Ser -> Gly |
| 5991                 | G         | G/T    | 0.158  | 69,764   | CDS: tat protein, CDS: rev protein | Gln -> His; Ser -> Ile |
| 5994                 | A         | A/C    | 0.161  | 64,744   | CDS: tat protein, CDS: rev protein | Asp -> Ala             |
| 5996                 | G         | G/A    | 0.273  | 65,305   | CDS: tat protein, CDS: rev protein | Glu -> Lys; Arg -> Gln |
| 6002                 | C         | C/A    | 0.441  | 64,814   | CDS: tat protein, CDS: rev protein | Ala -> Asp; Leu -> Ile |
| 6005                 | A         | A/T    | 0.173  | 65,486   | CDS: tat protein, CDS: rev protein | His -> Leu; Ile -> Phe |
| 6007                 | C         | C/A    | 0.258  | 65,425   | CDS: tat protein, CDS: rev protein | Gln -> Lys             |
| Index of nucleotides | Reference | Allele | SNP %  | Coverage | Overlapping annotations            | Amino_Acid_Change      |
| 6486                 | T         | T/G    | 1.035  | 24444    | CDS: envelope polyprotein          | Val -> Gly             |
| 6523                 | A         | A/T    | 8.664  | 30966    | CDS: envelope polyprotein          |                        |
| 6559                 | T         | T/A    | 1.231  | 31687    | CDS: envelope polyprotein          | Asp -> Glu             |
| 6672                 | A         | A/G    | 1.16   | 25090    | CDS: envelope polyprotein          | Lys -> Arg             |
| 6743                 | T         | T/A    | 1.599  | 26580    | CDS: envelope polyprotein          | Phe -> Ile             |
| 6752                 | A         | A/G    | 5.323  | 27070    | CDS: envelope polyprotein          | Lys -> Glu             |
| 6779                 | A         | A/G    | 1.427  | 22843    | CDS: envelope polyprotein          | Thr -> Ala             |
| 6800                 | T         | T/C    | 1.288  | 27785    | CDS: envelope polyprotein          | Cys -> Arg             |
| 6924                 | G         | G/T    | 3.19   | 28590    | CDS: envelope polyprotein          | Gly -> Val             |
| 6943                 | C         | C/T    | 1.359  | 30615    | CDS: envelope polyprotein          |                        |
| 6999                 | A         | A/G    | 1.234  | 24955    | CDS: envelope polyprotein          | Asn -> Ser             |
| 7016                 | G         | G/A    | 1.237  | 22071    | CDS: envelope polyprotein          | Glu -> Lys             |
| 7113                 | A         | A/G    | 1.427  | 22361    | CDS: envelope polyprotein          | Asn -> Ser             |
| 7137                 | G         | G/A    | 2.029  | 19907    | CDS: envelope polyprotein          | Arg -> His             |
| 7169                 | A         | A/G    | 1.758  | 16101    | CDS: envelope polyprotein          | Thr -> Ala             |
| 7213                 | T         | T/C    | 1.008  | 15083    | CDS: envelope polyprotein          |                        |
| 7224                 | A         | A/G    | 1.293  | 15236    | CDS: envelope polyprotein          | Lys -> Arg             |
| 7232                 | G         | G/A    | 1.166  | 15271    | CDS: envelope polyprotein          | Ala -> Thr             |
| 7332                 | C         | C/T    | 1.02   | 18037    | CDS: envelope polyprotein          | Thr -> Met             |
| 7384                 | G         | G/A    | 14.452 | 21464    | CDS: envelope polyprotein          |                        |
| 7396                 | T         | T/C    | 1.421  | 18721    | CDS: envelope polyprotein          |                        |
| 7399                 | G         | G/A    | 13.351 | 18725    | CDS: envelope polyprotein          | Trp -> Stp             |
| 7419                 | C         | C/T    | 2.662  | 19419    | CDS: envelope polyprotein          | Thr -> Ile             |
| 7424                 | G         | G/A    | 1.119  | 19834    | CDS: envelope polyprotein          | Gly -> Arg             |
| 7433                 | A         | A/C    | 3.382  | 19397    | CDS: envelope polyprotein          | Asn -> His             |
| 7452                 | C         | C/T    | 2.653  | 17907    | CDS: envelope polyprotein          | Thr -> Ile             |
| 7455                 | T         | T/C    | 1.018  | 20226    | CDS: envelope polyprotein          | Ile -> Thr             |
| 7477                 | A         | A/G    | 1.406  | 20632    | CDS: envelope polyprotein          |                        |
| 7505                 | G         | G/A    | 3.397  | 25404    | CDS: envelope polyprotein          | Gly -> Arg             |
| 7590                 | G         | G/A    | 1.186  | 20568    | CDS: envelope polyprotein          | Gly -> Asp             |
| 7649                 | T         | T/C    | 1.06   | 28478    | CDS: envelope polyprotein          | Trp -> Arg             |
| 7677                 | T         | T/C    | 1.708  | 30621    | CDS: envelope polyprotein          | Val -> Ala             |
| 7875                 | A         | A/C    | 2.897  | 65831    | CDS: envelope polyprotein          | Asn -> Ser             |
| 8014                 | A         | A/G    | 4.206  | 55260    | CDS: envelope polyprotein          |                        |
| 8048                 | G         | G/A    | 4.537  | 55258    | CDS: envelope polyprotein          | Ala -> Thr             |
| 8292                 | T         | T/C    | 1.641  | 21272    | CDS: envelope polyprotein          | Val -> Ala             |

**Fig. S5. Sequence analysis of mutant virus from animals treated with Ch A-1.** Viral RNAs were isolated from plasma of Ch A-1 treated mice and sequence changes in *tat/rev*, *gp120* and *gp41* sequences were analyzed. Positions of mutations unique to the Ch A-1 treated animals are listed. *gp120*, pink; *gp41*, blue; *tat/rev*, yellow.

# Table S1

**Table S1. HIV-1 viral loads in individual RAG-hu mice.** (A) Individual and average viral loads are indicated for the experiment described in Fig. 2A. (B) Individual and average viral loads are indicated for the experiment described in Fig. 2B. Nondetectable samples were set to a value of 1.

**A**

## Viral Loads (copies per ml plasma)

|                                |         | Week 1 | Week 2 | Week 3 | Week 4 | Week 5 | Week 6 | Week 7 | Week 8  | Week 9 | Week 11 | Week 12 | Week 13 |
|--------------------------------|---------|--------|--------|--------|--------|--------|--------|--------|---------|--------|---------|---------|---------|
| Uninfected control             | J210    | 1      | 1      | 1      | 1      | 1      | 1      | 1      | 1       | 1      | 1       | 1       | 1       |
|                                | J209    | 1      | 1      | 1      | 1      | 1      | 1      | 1      | 1       | 1      | 1       | 1       | 1       |
|                                | Average | 1      | 1      | 1      | 1      | 1      | 1      | 1      | 1       | 1      | 1       | 1       | 1       |
| Untreated                      | J258    | 3033   | 204054 | 41166  | 57616  | 55400  | 347675 | 174354 | 713219  | 284795 | 15088   | 113488  | 49082   |
|                                | J257    | 4619   | 1      | 41166  | 66418  | 56345  | 254748 | 150336 | 517821  | 305474 | 14198   | 94170   | 23024   |
|                                | J256    | 1857   | 204054 | 34886  | 30386  | 31203  | 81200  | 185884 | 1537897 | 814993 | 31291   | 69000   | 10800   |
|                                | J246    | 73500  | 73500  | 73500  | 73500  | 84300  | 94170  | 153396 | 330765  | 327654 | 14198   | 88491   | 15235   |
|                                | J245    | 1      | 1      | 12233  | 535000 | 234000 | 136769 | 240146 | 1863603 | 327654 | 20447   | 2881351 |         |
|                                | Average | 16602  | 96322  | 40590  | 152584 | 92250  | 182912 | 180823 | 992661  | 412114 | 19044   | 649300  | 24535   |
| siRNA ( <i>tat/rev</i> ) alone | J273    | 526    | 254606 | 41166  | 295553 | 1      | 164826 | 126587 | 163540  | 114497 | 93455   | 271097  | 120074  |
|                                | J266    | 5700   | 204054 | 37896  | 317328 | 167358 | 154886 | 186000 | 627489  | 106746 | 82757   | 347675  | 56325   |
|                                | J264    | 1      | 368192 | 41166  | 560401 | 76566  | 780432 | 134958 | 211280  | 131728 | 18106   | 211385  | 69240   |
|                                | J253    | 1      | 368192 | 62268  | 82207  | 82200  | 175403 | 713219 | 627489  | 31200  | 64894   | 113488  | 26421   |
|                                | J217    | 1857   | 396383 | 57322  | 109245 | 51400  | 145546 | 185884 | 174354  | 174359 | 27709   | 94170   | 64635   |
|                                | J216    | 7545   | 176061 | 41166  | 135215 | 1      | 34767  | 174354 | 713219  | 187019 | 27709   | 83155   | 10800   |
|                                | Average | 2605   | 294581 | 46831  | 249992 | 62921  | 294795 | 253500 | 419562  | 124258 | 52438   | 186828  | 57916   |
| Chimera A-1                    | J276    | 4015   | 121747 | 37896  | 71312  | 1      | 1      | 15877  | 13102   | 230786 | 34793   | 57255   | 60337   |
|                                | J274    | 8681   | 176061 | 34886  | 82207  | 1      | 1      | 1      | 1       | 1      | 1       | 1       | 7656    |
|                                | J272    | 2458   | 1      | 44718  | 452770 | 1      | 1      | 1      | 1       | Dead   |         |         |         |
|                                | J251    | 1      | 236498 | 34886  | 135215 | 1      | 1      | 1      | 2566    | 1      | 28303   | 94170   | 6228    |
|                                | J249    | 1      | 254606 | 25053  | 295553 | 1      | 1      | 1      | 1       | 1      | 1       | 1       | 8785    |
|                                | J247    | 1      | 121747 | 41166  | 560401 | 1      | 2368   | 97984  | 225251  | 99520  | 11569   | 83155   | 34793   |
|                                | Average | 2526   | 151777 | 36434  | 266243 | 1      | 396    | 18978  | 45564   | 24881  | 14934   | 46916   | 23560   |



# Table S1

**Table S1. HIV-1 viral loads in individual RAG-hu mice.** (A) Individual and average viral loads are indicated for the experiment described in Fig. 2A. (B) Individual and average viral loads are indicated for the experiment described in Fig. 2B. Nondetectable samples were set to a value of 1.

**B**

## Viral Loads (copies per ml plasma)

|                    |         | Week1 | Week2 | Week3   | Week4   | Week5   | Week6   | Week7  | Week8   | Week9   | Week10  | Week11 | Week12 |
|--------------------|---------|-------|-------|---------|---------|---------|---------|--------|---------|---------|---------|--------|--------|
| Uninfected Control | J570    | 1     | 1     | 1       | 1       | 1       | 1       | 1      | 1       | 1       | 1       | 1      | 1      |
|                    | J571    | 1     | 1     | 1       | 1       | 1       | 1       | 1      | 1       | 1       | 1       | 1      | 1      |
|                    | J572    | 1     | 1     | 1       | 1       | 1       | 1       | 1      | 1       | 1       | 1       | 1      | 1      |
|                    | Average | 1     | 1     | 1       | 1       | 1       | 1       | 1      | 1       | 1       | 1       | 1      | 1      |
| Untreated          | J565    | 15    | 46    | 70653   | 40173   | 1611916 | 2655213 | 978487 | 60589   | 13505   | 107329  | 81927  | 13975  |
|                    | J566    | 64    | 16469 | 526913  | 167200  | 3062118 | 8307855 | 270938 | 291214  | 335899  | 1731311 | 988012 | 46677  |
|                    | J567    | 60    | 2016  | 491653  | 3579558 | 8307830 | 2302355 | 593930 | 5652    | 42427   | 8190    | 33857  | 6770   |
|                    | Average | 46    | 6177  | 363073  | 1262310 | 4327288 | 4421808 | 614452 | 119152  | 130610  | 615610  | 367932 | 22474  |
| Mutant chimera A-5 | J554    | 1     | 1146  | 23277   | 56175   | 39446   | 24263   | 320608 | 716431  | 841330  | 2035506 | 49469  | 24459  |
|                    | J555    | 1     | 849   | 70653   | 24425   | 20593   | 14871   | 59073  | 1257084 | 39690   | 6266084 | 14665  | 7238   |
|                    | J556    | 1     | 1     | 526913  | 166751  | 1070324 | 987725  | 155435 | 661132  | 2205710 | 1733448 | 93791  | 13743  |
|                    | Average | 1     | 665   | 206948  | 82450   | 376788  | 342286  | 178372 | 878216  | 1028910 | 3345013 | 52641  | 15147  |
| Aptamer A-1        | J547    | 1     | 3     | 93229   | 599425  | 911450  | 83      | 176    | 1       | 709     | 26559   | 93791  | 113621 |
|                    | J548    | 1     | 12    | 302753  | 494757  | 494491  | 188     | 1      | 1       | 2961    | 4489    | 29650  | 38287  |
|                    | J549    | 56    | 79    | 24952   | 2296677 | 36377   | 429     | 98     | 1       | 3791    | 1820    | 599471 | 106580 |
|                    | Average | 19    | 31    | 140312  | 1130286 | 480773  | 233     | 92     | 1       | 2487    | 10956   | 240971 | 86162  |
| Chimera A-1        | J456    | 1     | 1921  | 308042  | 137626  | 562806  | 628     | 104    | 1       | 1       | 1102    | 2435   | 3346   |
|                    | J458    | 37    | 1921  | 125161  | 40783   | 479243  | 429     | 1      | 1       | 1       | 1304    | 6800   | 8774   |
|                    | J460    | 510   | 495   | 1319090 | 93745   | 42772   | 1       | 1      | 1       | 1       | 1675    | 1278   | 1539   |
|                    | Average | 183   | 1445  | 584097  | 90718   | 361607  | 353     | 35     | 1       | 1       | 1360    | 3504   | 4553   |

# Table S2

**Table S2. CD4:CD3 T-cell ratios in treated and control individual RAG-hu mice.** CD4:CD3 T-cell ratios were determined by FACS analysis. Cell levels are indicated relative to the baseline established prior to infection. Values are shown for individual mice. (A) Experiment in Figure 5A. (B) Experiment in Figure 5B.

## A CD4:CD3 T-cell ratio

Uninfected Control

|             | Initial | Week2    | Week4    | Week6    | Week8    | Week10   | Week12  | Week14  | Week16   | Week18  |
|-------------|---------|----------|----------|----------|----------|----------|---------|---------|----------|---------|
| J209        | 70.2    | 70.6     | 70.3     | 66.9     | 66.9     | 65.4     | 68      | 69.7    | 71.4     | 65.2    |
| J210        | 70.3    | 68.3     | 68.2     | 67.5     | 68.3     | 68.4     | 65.6    | 68.5    | 69.6     | 66.1    |
| Average     | 70.25   | 69.45    | 69.25    | 67.2     | 67.6     | 66.9     | 66.8    | 69.1    | 70.5     | 65.65   |
| to baseline | 1       | 0.988612 | 0.985765 | 0.956584 | 0.962278 | 0.952313 | 0.95089 | 0.98363 | 1.003559 | 0.93452 |

Untreated

|             | Initial | Week2    | Week4    | Week6    | Week8    | Week10   | Week12   | Week14   | Week16   | Week18   |
|-------------|---------|----------|----------|----------|----------|----------|----------|----------|----------|----------|
| J258        | 67.2    | 57.1     | 63       | 72.3     | 55.4     | 53.7     | 44.8     | 38.1     |          | 28.8     |
| J257        | 54.5    | 48.5     | 58       | 42.2     | 46       | 44.3     | 44.6     | 45.2     | 46.6     | 30.5     |
| J256        | 52.4    | 71.4     | 53       | 51.2     | 49.7     | 48.5     | 49.7     | 46.1     | 33.3     | 23.1     |
| J246        | 54.9    | 46.6     | 52.4     | 57       | 50.4     | 30.4     | 40.4     | 40.2     |          | 15       |
| J245        | 61.1    | 71.4     | 64       | 53.5     |          | 64.6     | 52.1     | 46.1     | 39.9     | 40.1     |
| Average     | 58.02   | 59       | 58.08    | 55.24    | 50.375   | 48.3     | 46.32    | 43.14    | 39.93333 | 27.5     |
| to baseline | 1       | 1.016891 | 1.001034 | 0.952085 | 0.868235 | 0.832472 | 0.798345 | 0.743537 | 0.688268 | 0.473974 |

siRNA (*tat/rev*) alone

|             | Initial | Week2    | Week4    | Week6    | Week8    | Week10   | Week12   | Week14   | Week16   | Week18   |
|-------------|---------|----------|----------|----------|----------|----------|----------|----------|----------|----------|
| J273        | 57.7    | 73.2     | 56       | 64.3     | 67.2     | 64.4     | 60.9     | 57.4     | 54.7     | 53.8     |
| J266        | 66.7    | 71.5     | 50       | 71.6     | 50.9     | 53.4     | 50.7     | 48.4     | 40       | 47.9     |
| J264        | 71.8    | 67.3     | 61.3     | 68.4     | 50.7     | 54.3     | 54.9     | 29.7     | 13.3     | 12.3     |
| J253        | 50      | 77.4     |          | 37.8     | 72       | 65.3     | 60       | 42.8     | 24.9     | 14.4     |
| J217        | 54.2    | 52       |          |          | 65.7     | 67.4     | 65       |          |          |          |
| J216        | 50      |          |          | 41.2     | 34.5     | 35.6     | 37.1     | 27.5     | 14.6     | 20       |
| Average     | 58.4    | 68.28    | 55.76667 | 56.66    | 56.83333 | 56.73333 | 54.76667 | 41.16    | 29.5     | 29.68    |
| to baseline | 1       | 1.169178 | 0.954909 | 0.970205 | 0.973174 | 0.971461 | 0.937785 | 0.704795 | 0.505137 | 0.508219 |

Chimera A-1

|             | Initial  | Week2    | Week4    | Week6    | Week8    | Week10   | Week12   | Week14   | Week16   | Week18   |
|-------------|----------|----------|----------|----------|----------|----------|----------|----------|----------|----------|
| J276        | 46.7     | 56.7     | 49.3     | 64.2     | 44.7     | 58.3     | 44.7     | 45.4     | 45.5     | 47.1     |
| J274        | 63.2     | 62.1     | 45       | 64.2     | 44.6     | 47.5     | 44.6     | 53.5     | 44.4     | 49.4     |
| J272        | 68.8     | 51       | 54       | 64.6     | 51.4     |          |          |          |          |          |
| J251        | 50       | 51       | 45       | 59.5     | 63.7     | 57.4     | 55.7     | 60.3     | 77.8     |          |
| J249        | 60.3     | 66.7     | 61.4     | 65.4     | 77.2     | 73.6     | 79       | 57.5     | 46.2     | 65.4     |
| J247        | 88.9     | 62.4     | 65.4     | 72.5     | 79       | 75.4     | 77.2     | 72.4     | 63.1     | 71.7     |
| Average     | 62.98333 | 58.31667 | 53.35    | 65.06667 | 60.1     | 62.44    | 60.24    | 57.82    | 55.4     | 58.4     |
| to baseline | 1        | 0.925906 | 0.847049 | 1.033078 | 0.954221 | 0.991373 | 0.956444 | 0.918021 | 0.879598 | 0.927229 |

# Table S2

**Table S2. CD4:CD3 T-cell ratios in treated and control individual RAG-hu mice.** CD4:CD3 T-cell ratios were determined by FACS analysis. Cell levels are indicated relative to the baseline established prior to infection. Values are shown for individual mice. (A) Experiment in Figure 5A. (B) Experiment in Figure 5B.

**B**

## CD4:CD3 T-cell ratio

| Uninfected Control | Initial  | Week1    | Week3    | Week5    | Week7    | Week9    | Week11   |
|--------------------|----------|----------|----------|----------|----------|----------|----------|
| J571               | 72.3     | 68.2     | 69.4     | 74.8     | 65.9     | 68.5     | 71.1     |
| J572               | 64.1     | 59.1     | 59.4     | 63.1     | 64.11    | 66.9     | 69.2     |
| J573               | 69.8     | 66.5     | 67.3     | 73.4     | 69.7     | 75.8     | 68.9     |
| Average            | 68.73333 | 64.6     | 65.36667 | 70.43333 | 66.57    | 70.4     | 69.73333 |
| to baseline        | 1        | 0.939864 | 0.951018 | 1.024733 | 0.968526 | 1.024248 | 1.014549 |

| Untreated   | Initial  | Week1    | Week3    | Week5    | Week7    | Week9    | Week11   |
|-------------|----------|----------|----------|----------|----------|----------|----------|
| J565        | 68.3     | 76.3     | 69.2     | 65       | 62.8     | 54.5     | 40       |
| J566        | 72.4     | 71.3     | 70.1     | 68       |          | 65       | 47.3     |
| J567        | 68       | 62.4     | 63.8     | 59.3     | 52.7     | 53.3     | 50       |
| Average     | 69.56667 | 70       | 67.7     | 64.1     | 57.75    | 57.6     | 45.76667 |
| to baseline | 1        | 1.006229 | 0.973167 | 0.921418 | 0.830139 | 0.827983 | 0.657882 |

| Mutant chimera A-5 | Initial  | Week1    | Week3    | Week5    | Week7    | Week9    | Week11   |
|--------------------|----------|----------|----------|----------|----------|----------|----------|
| J554               | 61.9     | 78.8     | 75       |          | 42.3     | 53.3     | 33.3     |
| J555               | 56       | 63       | 53.3     | 47.1     | 58.7     | 52.9     | 32.3     |
| J556               | 61.9     | 76       | 68.8     | 52       | 62.8     | 52.1     |          |
| Average            | 59.93333 | 72.6     | 65.7     | 49.55    | 54.6     | 52.76667 | 32.8     |
| to baseline        | 1        | 1.211346 | 1.096218 | 0.826752 | 0.911012 | 0.880423 | 0.547275 |

| Aptamer A-1 | Initial  | Week1    | Week3    | Week5    | Week7    | Week9    | Week11   |
|-------------|----------|----------|----------|----------|----------|----------|----------|
| J549        | 62.5     | 54.5     | 55.7     | 58.9     | 85.3     | 83.3     | 81.8     |
| J548        | 57.1     | 60       | 52.6     |          | 50       | 50.4     | 46.9     |
| J547        | 60       | 66.7     | 63.8     | 63.4     | 58.8     |          | 49       |
| Average     | 59.86667 | 60.4     | 57.36667 | 61.15    | 64.7     | 66.85    | 59.23333 |
| to baseline | 1        | 1.008909 | 0.958241 | 1.021437 | 1.080735 | 1.116648 | 0.989421 |

| Chimera A-1 | Initial | Week1    | Week3    | Week5    | Week7    | Week9    | Week11   |
|-------------|---------|----------|----------|----------|----------|----------|----------|
| J456        | 66.7    | 69       | 60.5     | 67.6     | 66.1     | 61.5     | 50       |
| J458        | 66.1    | 71       | 66       | 59.1     | 65.8     | 68       | 78.4     |
| J460        | 58.9    | 66.7     | 64.8     | 65.3     | 77.6     | 75.5     | 70.5     |
| Average     | 63.9    | 68.9     | 63.76667 | 64       | 69.83333 | 68.33333 | 66.3     |
| to baseline | 1       | 1.078247 | 0.997913 | 1.001565 | 1.092853 | 1.069379 | 1.037559 |

# Table S3

**Table S3. *P* values of HIV-1 viral loads in individual RAG-hu mice.** (A) Individual *P* value comparisons are calculated for the experiment described in Fig. 2A. (B) Individual *P* value comparisons are calculated for the experiment described in Fig. 2B.

## A: Statistical analysis of viral load data

| Comparison                     |    |                                | <i>P</i> value    |
|--------------------------------|----|--------------------------------|-------------------|
| Uninfected Control             | vs | Untreated                      | <i>P</i> = 0.0476 |
| Uninfected Control             | vs | siRNA ( <i>tat/rev</i> ) alone | <i>P</i> = 0.0357 |
| Uninfected Control             | vs | Chimera A-1                    | <i>P</i> = 0.0714 |
| Untreated                      | vs | siRNA ( <i>tat/rev</i> ) alone | <i>P</i> = 1.0000 |
| Untreated                      | vs | Chimera A-1                    | <i>P</i> = 0.0065 |
| siRNA ( <i>tat/rev</i> ) alone | vs | Chimera A-1                    | <i>P</i> = 0.0022 |

**Overall *P* value = 0.0029**

## B: Statistical analysis of viral load data

| Comparison         |    |                    | <i>P</i> value    |
|--------------------|----|--------------------|-------------------|
| Uninfected Control | vs | Untreated          | <i>P</i> = 0.0024 |
| Uninfected Control | vs | Mutant chimera A-5 | <i>P</i> = 0.0007 |
| Uninfected Control | vs | Aptamer A-1        | <i>P</i> = 0.0009 |
| Uninfected Control | vs | Chimera A-1        | <i>P</i> = 0.0023 |
| Untreated          | vs | Mutant chimera A-5 | <i>P</i> = 0.2900 |
| Untreated          | vs | Aptamer A-1        | <i>P</i> = 0.0106 |
| Untreated          | vs | Chimera A-1        | <i>P</i> = 0.0036 |
| Mutant chimera A-5 | vs | Aptamer A-1        | <i>P</i> = 0.0010 |
| Mutant chimera A-5 | vs | Chimera A-1        | <i>P</i> = 0.0005 |
| Aptamer A-1        | vs | Chimera A-1        | <i>P</i> = 0.0418 |

**Overall *P* value = 0.0107**

## Table S4A:

**Table S4. *P* values of CD4 T-cell levels in treated and control individual RAG-hu mice.** (A) Individual *P* value comparisons are calculated for the experiment described in Fig. 2A. (B) Individual *P* value comparisons are calculated for the experiment described in Fig. 2B.

### A: Statistical analysis of CD4:CD3 T-cell data

| Comparison                     |    |                                | <i>P</i> value    |
|--------------------------------|----|--------------------------------|-------------------|
| Uninfected Control             | vs | Untreated                      | <i>P</i> = 0.0476 |
| Uninfected Control             | vs | siRNA ( <i>tat/rev</i> ) alone | <i>P</i> = 0.0714 |
| Uninfected Control             | vs | Chimera A-1                    | <i>P</i> = 0.2500 |
| Untreated                      | vs | siRNA ( <i>tat/rev</i> ) alone | <i>P</i> = 0.4307 |
| Untreated                      | vs | Chimera A-1                    | <i>P</i> = 0.0476 |
| siRNA ( <i>tat/rev</i> ) alone | vs | Chimera A-1                    | <i>P</i> = 0.2944 |

**Overall *P* value = 0.0736**

### B: Statistical analysis of CD4:CD3 T-cell data

| Comparison         |    |                    | <i>P</i> value    |
|--------------------|----|--------------------|-------------------|
| Uninfected Control | vs | Untreated          | <i>P</i> = 0.1872 |
| Uninfected Control | vs | Mutant chimera A-5 | <i>P</i> = 0.0577 |
| Uninfected Control | vs | Aptamer A-1        | <i>P</i> = 0.2830 |
| Uninfected Control | vs | Chimera A-1        | <i>P</i> = 0.7031 |
| Untreated          | vs | Mutant chimera A-5 | <i>P</i> = 0.3284 |
| Untreated          | vs | Aptamer A-1        | <i>P</i> = 0.7860 |
| Untreated          | vs | Chimera A-1        | <i>P</i> = 0.2518 |
| Mutant chimera A-5 | vs | Aptamer A-1        | <i>P</i> = 0.6726 |
| Mutant chimera A-5 | vs | Chimera A-1        | <i>P</i> = 0.0742 |
| Aptamer A-1        | vs | Chimera A-1        | <i>P</i> = 0.3512 |

**Overall *P* value = 0.1147**
